# Supplementary material for: Adsorption of organic micropollutants to biosolids-derived biochar: estimation of thermodynamic parameters
Source: Royal Society of Chemistry journal article supplement (doi:10.1039/c8ew00854j), 2019-01-01
Supplement: c8ew00854j1.pdf [file c8ew00854j1.pdf]

## **Adsorption of Organic Micropollutants to Biosolids-Derived Biochar: Estimation of Thermodynamic Parameters**

### **Supplemental Information**

Yiran Tong<sup>a,α</sup>, Brooke K. Mayer<sup>a</sup> Patrick J. McNamara<sup>a\*</sup>

<sup>a</sup> Department of Civil, Construction and Environmental Engineering, Marquette University, 1637 W. Wisconsin Ave., Milwaukee, WI 53233, USA

\*Corresponding author

Email: Patrick.McNamara@marquette.edu

Phone: 414-288-2188

<sup>α</sup>Current affiliation: Department of Civil, Environmental and Geo- Engineering, University of MN-Twin Cities

The supplemental information consists of 9 sections (including 4 figures and 7 tables) describing:

S1: LC-MS operation and analysis

S2: Isotherm fitting parameters for micropollutants under single-solute conditions

S3: Isostere curves for micropollutants under single-solute conditions

S4: Calculations of exchange or adsorption capacity and recovery rate

S5: Single-solute van't Hoff curves for calculating change of enthalpy, free energy and entropy

S6: Comparison of significant difference between single-solute and multi solute isotherms

S7: Isostere curves for micropollutants under multi-solute conditions

S8: Multi-solute van't Hoff curves for calculating change of enthalpy, free energy and entropy

S9: Comparison of differences between single-solute and multi-solute adsorption enthalpy and entropy changes

## S1: LC-MS operation and analysis

Internal standards of benzyldimethyldodecylammonium chloride (BAC-C12), licarbazepine (L-CBZ), estrone (E1), and 13C-TCS methanol stock solutions were added in 2 mL LC-MS vials, separately for single-solute experiments and all together for multi-solute experiments. The solvent was evaporated before samples were added. The target concentration of the internal standards was 100 µg/L. Filtered water samples were mixed with methanol (50:50) to make 1 mL solutions in the vials.

For BAC-C10 and TCS, a binary gradient of Milli-Q water (Pump A) and 100% HPLC-grade methanol (Pump B) was used as the eluent. An isocratic flow of 0.4 mL/min (4% Pump A+96% Pump B) was maintained for 10 min. Sample injection was 5 µL.

For CBZ, a binary gradient of Milli-Q water (Pump A) and HPLC-grade acetonitrile in combination of 0.1% formic acid (v/v) (Pump B) was the eluent. Pump B started at 20% and ramped up to 95% at 9 min. The gradient maintained for 1 min and decreased to 20% at the 12<sup>th</sup> min. The binary eluent flow rate was 0.3 mL/min. Sample injection volume was 10 µL.

For E2 and EE2, the eluents were Milli-Q water (Pump A) and 100% HPLC-grade methanol (Pump B). Pump B started at 65% and ramped up to 85% at the 8<sup>th</sup> min. The gradient maintained for 5 min and decreased to 35% at the 15<sup>th</sup> min. The binary eluent flow rate was 0.4 mL/min. Sample injection volume was 15 µL.

All samples were passed through a Phenomenex<sup>®</sup> (Torrance, CA) Luna 3u C18 reverse-phase column.

The MS detection limits of BAC-C10, CBZ, E2, EE2, TCS and their internal standards are listed in Table 5A. Recovery of tested compounds was 70 – 130%.

**Table S1.** Mass spectrometry operation parameters for micropollutants and internal standards. For all analyses, the acquisition mode was used for ion monitoring (SIM) and the ionization method was electrospray ionization (ESI).

| Compound | m/z | Retention time | Internal standard | m/z | Method detection limit (µg/L) |
|----------|-----|----------------|-------------------|-----|-------------------------------|
| BAC-C10  | 276 | 1.4            | BAC-C12           | 304 | 5                             |
| CBZ      | 237 | 7.5            | L-CBZ             | 255 | 4                             |
| E2       | 271 | 4.2            | E1                | 269 | 6                             |
| EE2      | 295 | 4.3            |                   |     | 12                            |
| TCS      | 287 | 2.9            | 13C-TCS           | 299 | 8                             |

## S2. Isotherm fitting parameters for micropollutants under single-solute conditions

Adsorption equilibrium data was fit with linear, Langmuir and Freundlich isotherms, due to the isotherms' application for low-concentration (< mg/L) adsorption. As Table S2 shows, K,  $K_L$ , and  $K_f$  values are partitioning coefficients for linear, Langmuir and Freundlich isotherms, respectively. The partitioning coefficients are important because of their relationship with thermodynamic equilibrium coefficients.

**Table S2.** Isotherm parameters for micropollutants under single-solute conditions

| <b>Compound</b> | <b>Isotherm</b> | <b>Parameter</b> | <b>4°C</b> | <b>25°C</b> | <b>35°C</b> | <b>50°C</b> |
|-----------------|-----------------|------------------|------------|-------------|-------------|-------------|
| <b>BAC-C10</b>  | Linear          | K                | 0.469      | 0.359       | 0.569       | 1.03        |
|                 |                 | B                | 72.6       | 472         | 503         | 240         |
|                 |                 | R <sup>2</sup>   | 0.923      | 0.978       | 0.711       | 0.972       |
| <b>CBZ</b>      | Linear          | K                | 0.59       | 0.822       | 0.715       | 1.05        |
|                 |                 | B                | 155        | 121         | 294         | 269         |
|                 |                 | R <sup>2</sup>   | 0.908      | 0.929       | 0.925       | 0.999       |
| <b>E2</b>       | Freundlich      | $K_f$            | 23.4       | 41.0        | 63.8        | 106         |
|                 |                 | n                | 0.55       | 0.57        | 0.51        | 0.46        |
|                 |                 | R <sup>2</sup>   | 0.856      | 0.949       | 0.954       | 0.965       |
|                 | Langmuir        | $Q_m$            | 1890       | 9800        | 3860        | 7140        |
|                 |                 | $K_L$            | 0.0022     | 0.0005      | 0.0058      | 0.0033      |
|                 |                 | R <sup>2</sup>   | 0.856      | 0.900       | 0.932       | 0.936       |
| <b>EE2</b>      | Linear          | K                | 2.10       | 4.00        | 3.80        | 4.37        |
|                 |                 | B                | 244        | -31.7       | 725         | 837         |
|                 |                 | R <sup>2</sup>   | 0.987      | 0.992       | 0.997       | 0.966       |
| <b>TCS</b>      | Freundlich      | $K_f$            | 19.4       | 27.0        | 207         | 108         |
|                 |                 | n                | 0.73       | 0.71        | 0.43        | 0.58        |
|                 |                 | R <sup>2</sup>   | 0.974      | 0.866       | 0.985       | 0.959       |
|                 | Langmuir        | $Q_m$            | 5440       | 26800       | 3650        | 8340        |
|                 |                 | $K_L$            | 0.0009     | 0.0002      | 0.0102      | 0.0018      |
|                 |                 | R <sup>2</sup>   | 0.955      | 0.856       | 0.945       | 0.840       |

### S3. Isostere curves for micropollutants under single-solute conditions

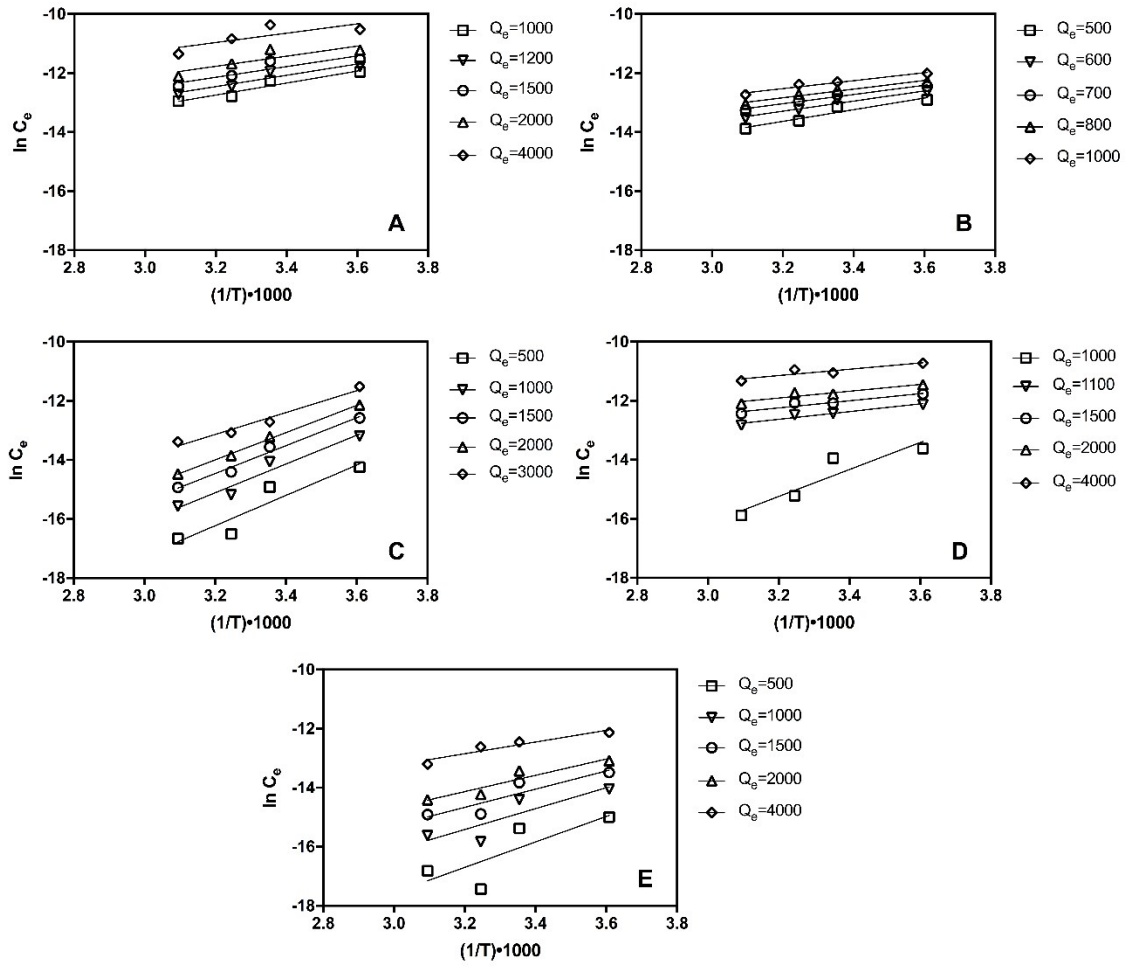

**Figure S1.** Isostere curves for A) BAC-C10, B) CBZ, C) E2, D) EE2, and E) TCS at multiple surface loading ( $Q_e$ ) values, in single-solute tests.

**Table S3.** Slopes of isostere curves for micropollutants under single-solute conditions

| <b>Compound</b> | <b><math>Q_e</math> mmol/g biochar</b> | <b><math>\ln C_e/(1/T)</math></b> |
|-----------------|----------------------------------------|-----------------------------------|
| <b>BAC-C10</b>  | 0.0032                                 | 2.03                              |
|                 | 0.0038                                 | 1.91                              |
|                 | 0.0052                                 | 1.91                              |
|                 | 0.0064                                 | 1.81                              |
|                 | 0.0128                                 | 1.58                              |
| <b>CBZ</b>      | 0.0021                                 | 1.97                              |
|                 | 0.0025                                 | 1.71                              |
|                 | 0.0030                                 | 1.56                              |
|                 | 0.0034                                 | 1.47                              |
|                 | 0.0042                                 | 1.35                              |
| <b>E2</b>       | 0.0018                                 | 5.13                              |
|                 | 0.0037                                 | 4.86                              |
|                 | 0.0055                                 | 4.72                              |
|                 | 0.0073                                 | 4.61                              |
|                 | 0.0110                                 | 3.71                              |
| <b>EE2</b>      | 0.0034                                 | 6.25                              |
|                 | 0.0037                                 | 1.85                              |
|                 | 0.0052                                 | 1.72                              |
|                 | 0.0111                                 | 1.65                              |
|                 | 0.0148                                 | 1.54                              |
| <b>TCS</b>      | 0.0017                                 | 4.31                              |
|                 | 0.0035                                 | 3.53                              |
|                 | 0.0052                                 | 3.08                              |
|                 | 0.0069                                 | 2.76                              |
|                 | 0.0138                                 | 1.98                              |

**S4. Single-solute van't Hoff curves for calculating change of enthalpy, free energy and entropy**

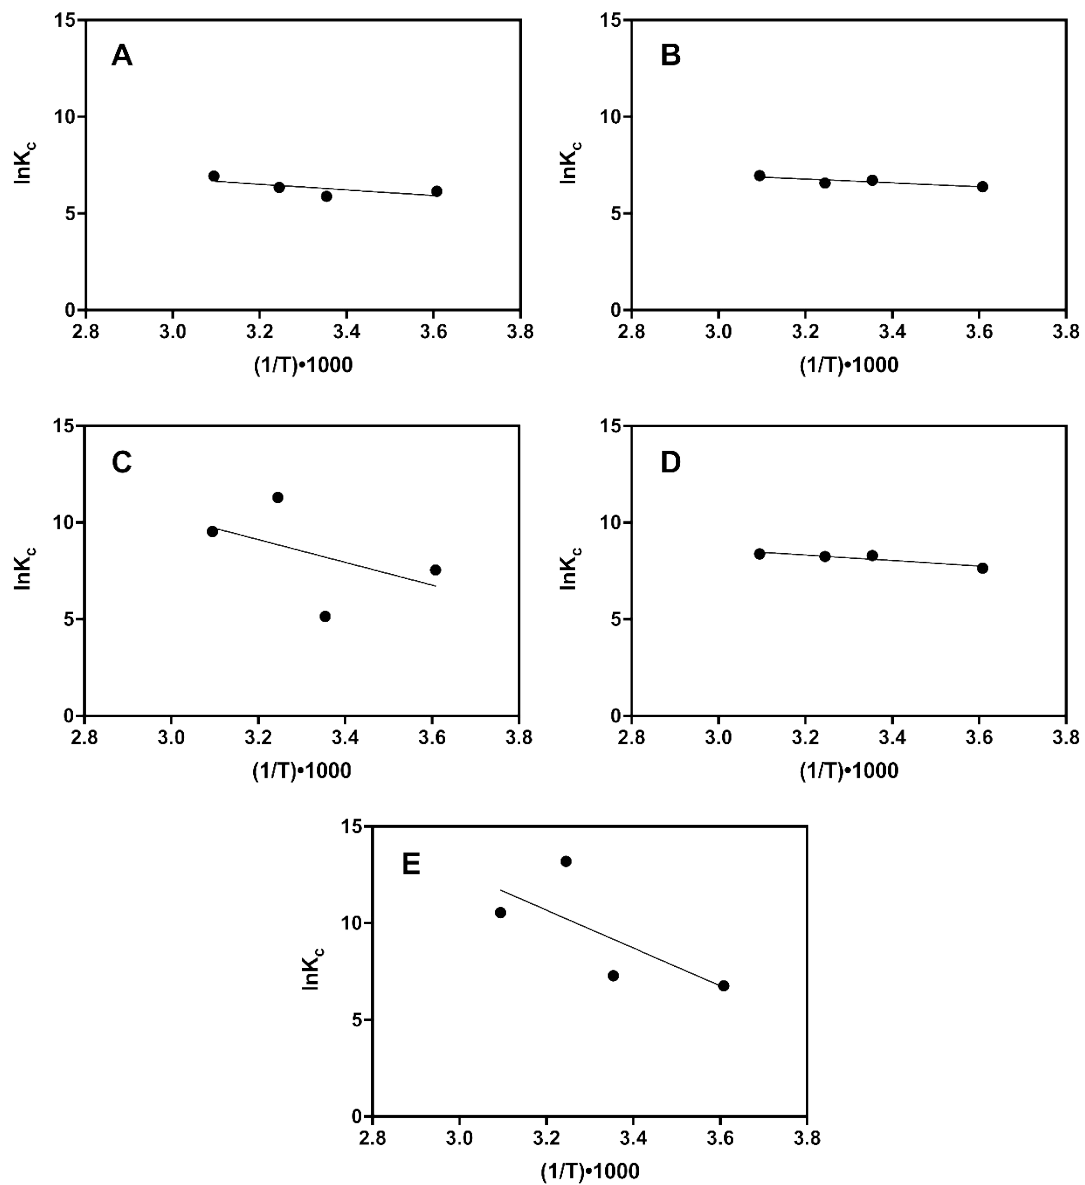

**Figure S2.** Single-solute van't Hoff curves for A) BAC-C10, B) CBZ, C) E2, D) EE2, and E) TCS.

## S5. Isotherm parameters for micropollutants under multi-solute conditions

**Table S4.** Isotherm parameters for micropollutants under multi-solute conditions

| <b>Compound</b> | <b>Isotherm</b> | <b>Parameter</b> | <b>4°C</b> | <b>25°C</b> | <b>35°C</b> | <b>50°C</b> |
|-----------------|-----------------|------------------|------------|-------------|-------------|-------------|
| <b>BAC-C10</b>  | Linear          | K                | 0.63       | 0.70        | 0.91        | 0.47        |
|                 |                 | B                | -118       | -17.3       | 87.8        | 232         |
|                 |                 | R <sup>2</sup>   | 0.655      | 0.672       | 0.948       | 0.9999      |
| <b>CBZ</b>      | Linear          | K                | 0.57       | 0.24        | 0.37        | 0.81        |
|                 |                 | B                | 54.5       | 252         | 281         | 159         |
|                 |                 | R <sup>2</sup>   | 0.850      | 0.960       | 0.981       | 0.724       |
| <b>E2</b>       | Freundlich      | K <sub>f</sub>   | 16.7       | 12.9        | 109         | 87.2        |
|                 |                 | n                | 0.66       | 0.81        | 0.52        | 0.63        |
|                 |                 | R <sup>2</sup>   | 0.711      | 0.977       | 0.971       | 0.901       |
|                 | Langmuir        | K <sub>L</sub>   | 1520       | 2870        | 2350        | 3090        |
|                 |                 | B                | 494        | 441         | 211         | 228         |
|                 |                 | R <sup>2</sup>   | 0.663      | 0.961       | 0.939       | 0.924       |
| <b>EE2</b>      | Linear          | K                | 0.64       | 1.48        | 1.23        | 1.61        |
|                 |                 | B                | 212        | 308         | 501         | 518         |
|                 |                 | R <sup>2</sup>   | 0.905      | 0.996       | 0.842       | 0.885       |
| <b>TCS</b>      | Freundlich      | K <sub>f</sub>   | 13.6       | 54.2        | 95.9        | 109         |
|                 |                 | n                | 0.75       | 0.60        | 0.55        | 0.51        |
|                 |                 | R <sup>2</sup>   | 0.812      | 0.969       | 0.951       | 0.910       |
|                 | Langmuir        | K <sub>L</sub>   | 5960       | 3600        | 3360        | 2890        |
|                 |                 | B                | 1560       | 345         | 130         | 123         |
|                 |                 | R <sup>2</sup>   | 0.767      | 0.954       | 0.921       | 0.815       |

## S6. Comparison of significant difference between single-solute and multi-solute isotherms

**Table S5.** p-values for comparing the difference between single-solute and multi-solute isotherms

| <b>Compound</b> | <b>4°C</b> | <b>25°C</b> | <b>35°C</b> | <b>50°C</b> |
|-----------------|------------|-------------|-------------|-------------|
| <b>BAC-C10</b>  | N/A        | N/A         | 0.208       | 0.062       |
| <b>CBZ</b>      | 0.926      | 0.012       | 0.254       | 0.589       |
| <b>E2</b>       | 0.017      | <0.0001     | <0.0001     | <0.0001     |
| <b>EE2</b>      | 0.0003     | <0.0001     | 0.0002      | 0.003       |
| <b>TCS</b>      | 0.035      | 0.850       | 0.072       | <0.0001     |

N/A indicates that linear fitting of BAC-C10 in multi-solute condition was poor (<0.7); therefore, they cannot be compared with single-solute conditions.



## S7. Isostere curves for micropollutants under multi-solute conditions

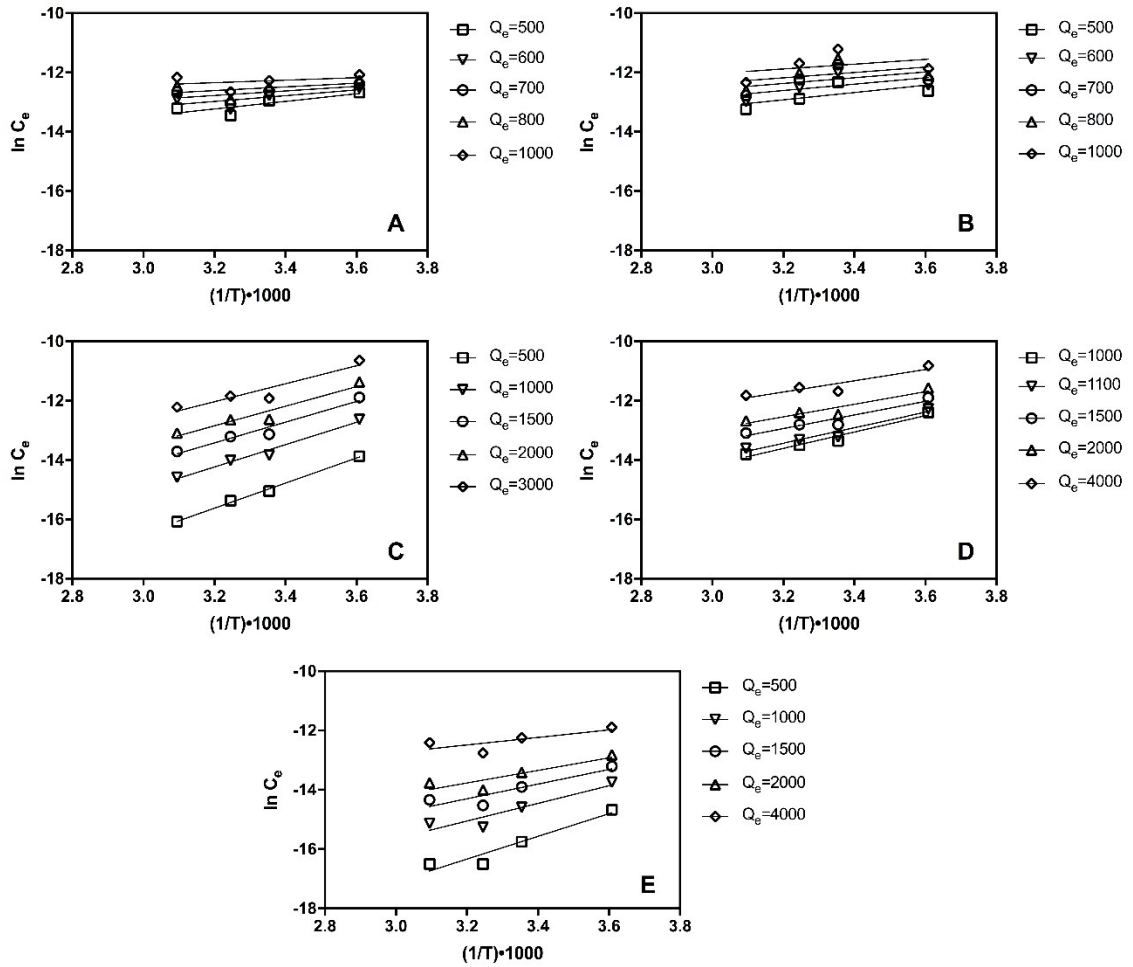

**Figure S3.** Isostere curves for A) BAC-C10, B) CBZ, C) E2, D) EE2, and E) TCS at multiple surface loading ( $Q_e$ ) values in multi-solute tests.

**Table S6.** Slopes of isostere curves for micropollutants under multi-solute conditions

| <b>Compound</b> | <b>Q<sub>e</sub> mmol/g biochar</b> | <b>lnC<sub>e</sub>/(1/T)</b> |
|-----------------|-------------------------------------|------------------------------|
| BAC-C10         | 0.0016                              | 1.28                         |
|                 | 0.0019                              | 0.97                         |
|                 | 0.0024                              | 0.77                         |
|                 | 0.0026                              | 0.62                         |
|                 | 0.0032                              | 0.42                         |
| CBA             | 0.0021                              | 1.23                         |
|                 | 0.0025                              | 1.07                         |
|                 | 0.0030                              | 0.97                         |
|                 | 0.0034                              | 0.90                         |
|                 | 0.0042                              | 0.81                         |
| E2              | 0.0018                              | 4.23                         |
|                 | 0.0037                              | 3.76                         |
|                 | 0.0055                              | 3.49                         |
|                 | 0.0074                              | 3.30                         |
|                 | 0.0110                              | 3.03                         |
| EE2             | 0.0034                              | 2.76                         |
|                 | 0.0037                              | 2.62                         |
|                 | 0.0052                              | 2.29                         |
|                 | 0.0111                              | 2.12                         |
|                 | 0.0148                              | 1.90                         |
| TCS             | 0.0017                              | 3.83                         |
|                 | 0.0035                              | 2.97                         |
|                 | 0.0052                              | 2.47                         |
|                 | 0.0069                              | 2.12                         |
|                 | 0.0138                              | 1.27                         |

**S8. Multi-solute van't Hoff curves for calculating change of enthalpy, free energy and entropy**

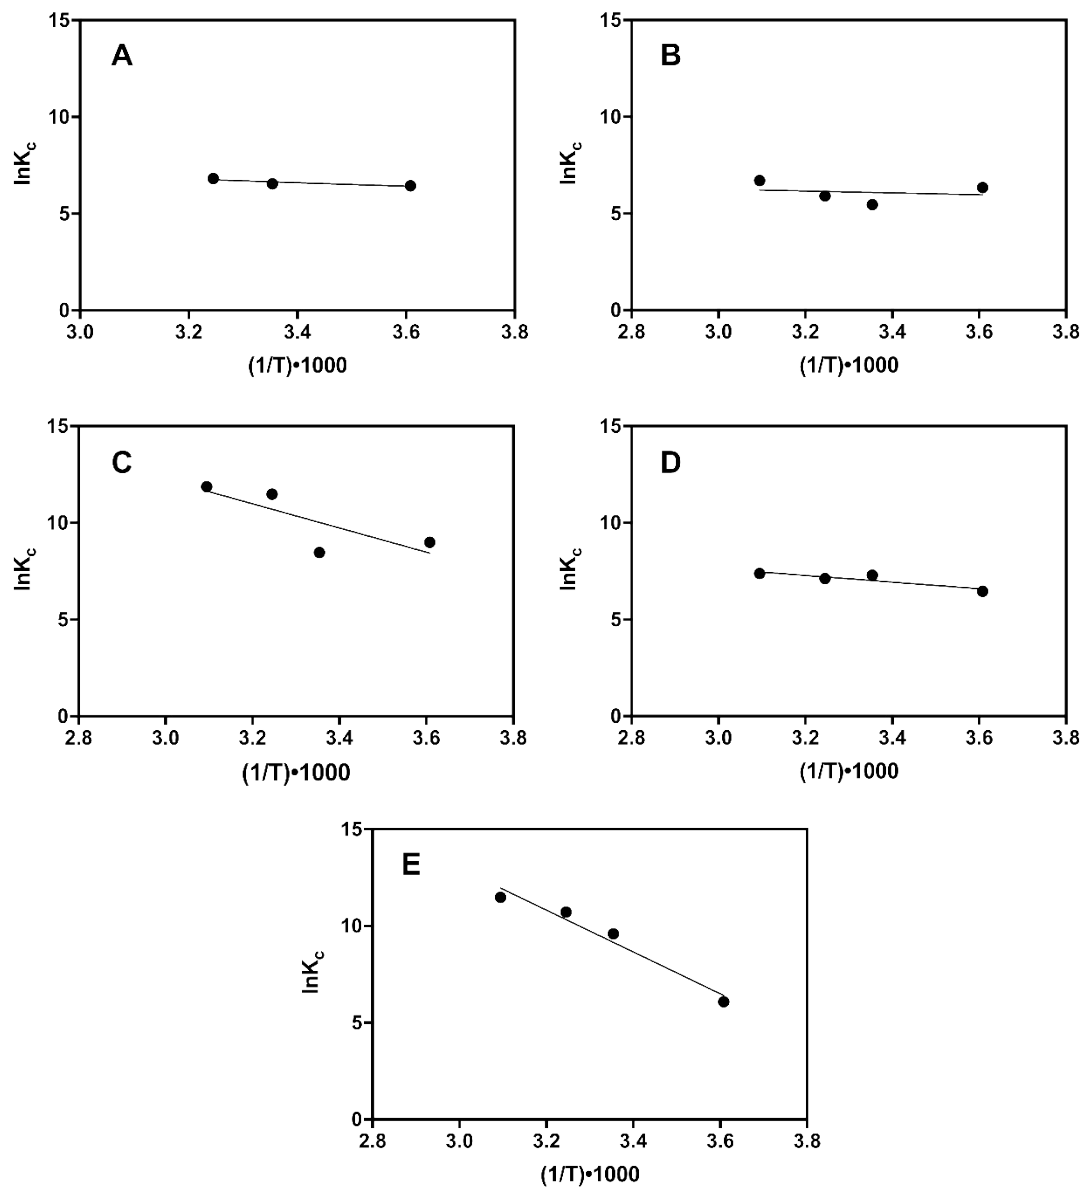

**Figure S4.** Multi-solute van't Hoff curves for A) BAC-C10, B) CBZ, C) E2, D) EE2, and E) TCS.

**S9. Comparison of differences between single-solute and multi-solute adsorption enthalpy and entropy changes**

**Table S7.** p-values for comparing the difference between single-solute and multi-solute enthalpy and entropy changes

| <b>Compound</b> | <b>p for comparing <math>\Delta H^0</math></b> | <b>p for comparing <math>\Delta S^0</math></b> |
|-----------------|------------------------------------------------|------------------------------------------------|
| <b>BAC-C10</b>  | 0.744                                          | 0.166                                          |
| <b>CBZ</b>      | 0.795                                          | 0.124                                          |
| <b>E2</b>       | 0.966                                          | 0.248                                          |
| <b>EE2</b>      | 0.706                                          | 0.0004                                         |
| <b>TCS</b>      | 0.894                                          | 0.897                                          |
